# Supplementary material for: Acute Myocardial Infarction due to External Compression of the Left Main Coronary Artery by a Large Pulmonary Artery Aneurysm
Source: Case Rep Cardiol. 2021 Feb 22;2021:8850044. doi: 10.1155/2021/8850044 (PMC7925067; doi:10.1155/2021/8850044)
Supplement: Supplementary Materials — Video 1: transthoracic echocardiography demonstrating anterolateral left ventricular hypokinesis. Video 2: intravascular ultrasound examination of the left main coronary artery, demonstrating external compression with a slit-like lumen and absence of atheroma. Video 3: intravascular ultrasound examination of the left main coronary artery, demonstrating resolution of external compression and well-apposed stent. [file 8850044.f1.zip]

Archive with 3 entries (3 files):
- Case reports in Cardiology videos/Video 1.mp4
- Case reports in Cardiology videos/Video 2.mp4
- Case reports in Cardiology videos/Video 3.mp4
